# Supplementary material for: Scalable synthesis of one-dimensional Na2Li2Ti6O14 nanofibers as ultrahigh rate capability anodes for lithium-ion batteries
Source: Royal Society of Chemistry journal article supplement (doi:10.1039/c8qi00973b), 2018-11-17
Supplement: c8qi00973b1.pdf [file c8qi00973b1.pdf]

## Supporting information for

### **Scalable synthesis of one-dimensional Na<sub>2</sub>Li<sub>2</sub>Ti<sub>6</sub>O<sub>14</sub> nanofibers as ultrahigh rate capability anodes for lithium-ion batteries**

Chao Wang,<sup>a</sup> Xing Xin,<sup>\*a,c</sup> Miao Shu,<sup>b</sup> Shuiping Huang,<sup>\*a</sup> Yang Zhang,<sup>d</sup> Xing Li<sup>\*a,b</sup>

<sup>a</sup> Faculty of Science, College of Materials Science and Chemical Engineering, Ningbo University, Ningbo 315211, China

<sup>b</sup> Key Laboratory of Photoelectric Materials and Devices of Zhejiang Province, Ningbo 315211, China

<sup>c</sup> National Institute for Materials Science, 1-1 Namiki, Tsukuba 305-0044, Japan

<sup>d</sup> Electron Microscopy for Materials Science (EMAT), University of Antwerp, Groenenborgerlaan 171, 2020 Antwerp, Belgium

Corresponding author email: [lixing@nbu.edu.cn](mailto:lixing@nbu.edu.cn)

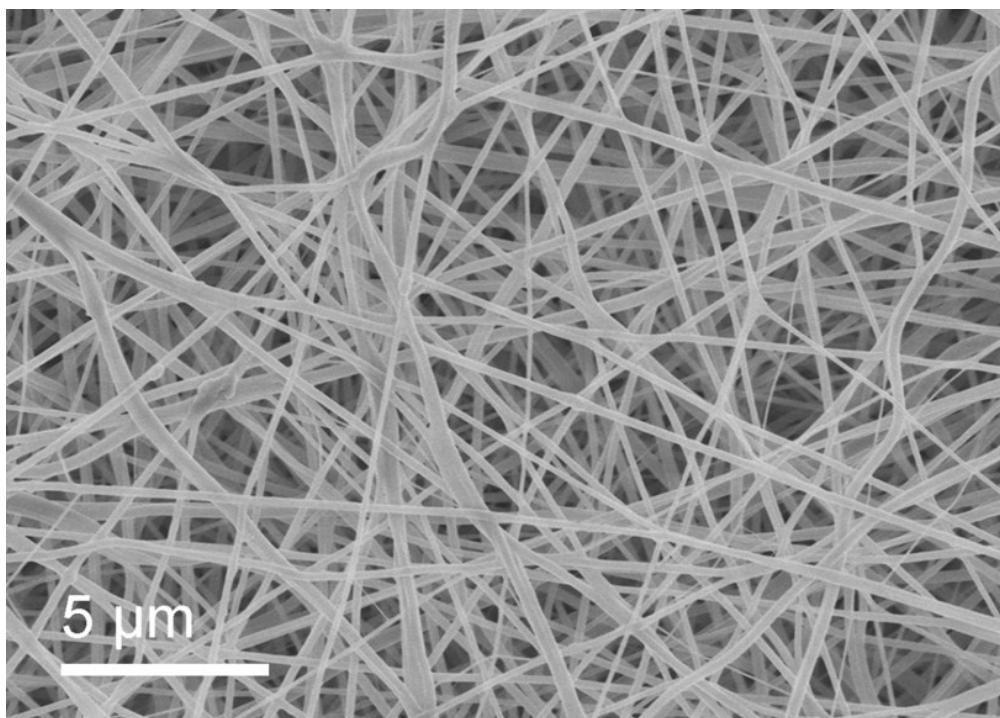

**Fig. S1.** SEM images of precursor nanofibers.

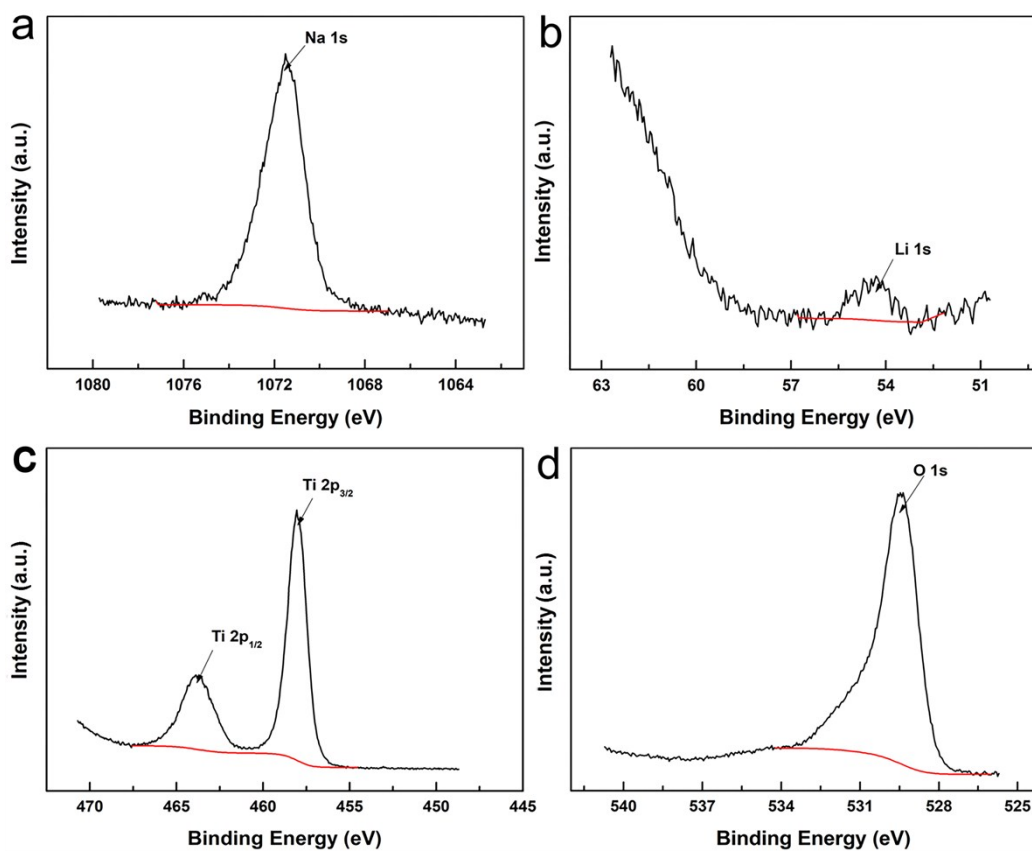

**Fig. S2.** High-resolution XPS spectra of Na (a), Li (b), Ti (c) and O element (d).

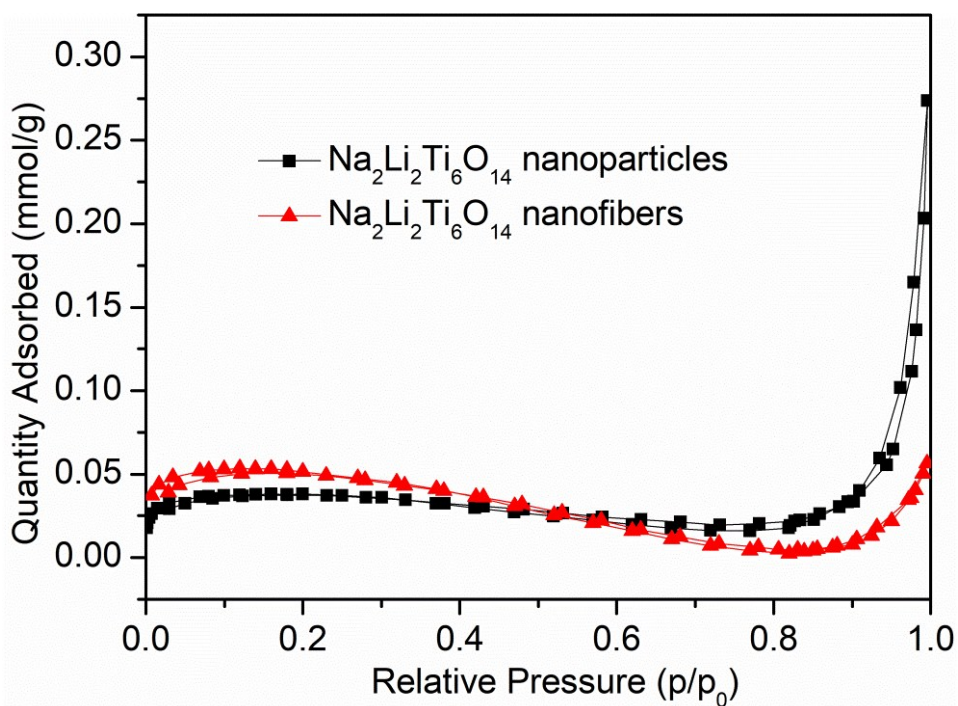

**Fig. S3** The BET isothermal curves of the  $\text{Na}_2\text{Li}_2\text{Ti}_6\text{O}_{14}$  nanofibers and nanoparticles.

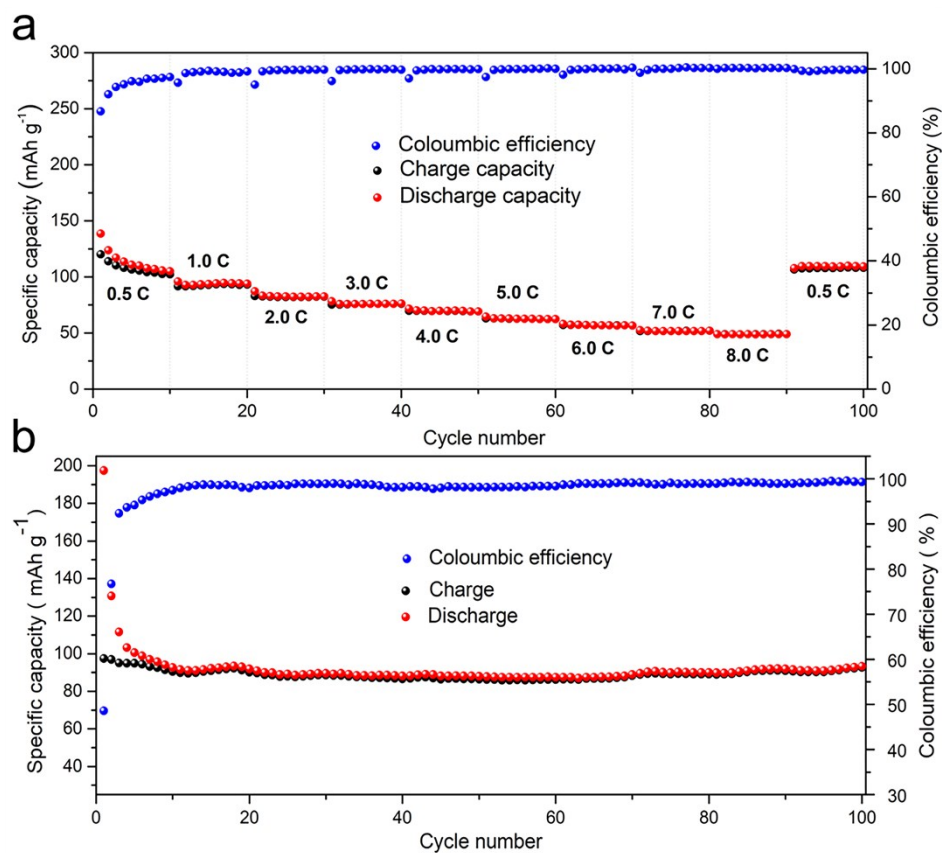

**Fig. S4** (a) Rate performance of  $\text{Na}_2\text{Li}_2\text{Ti}_6\text{O}_{14}$  nanoparticles. (b) Cycling performances at current densities of 1 C.

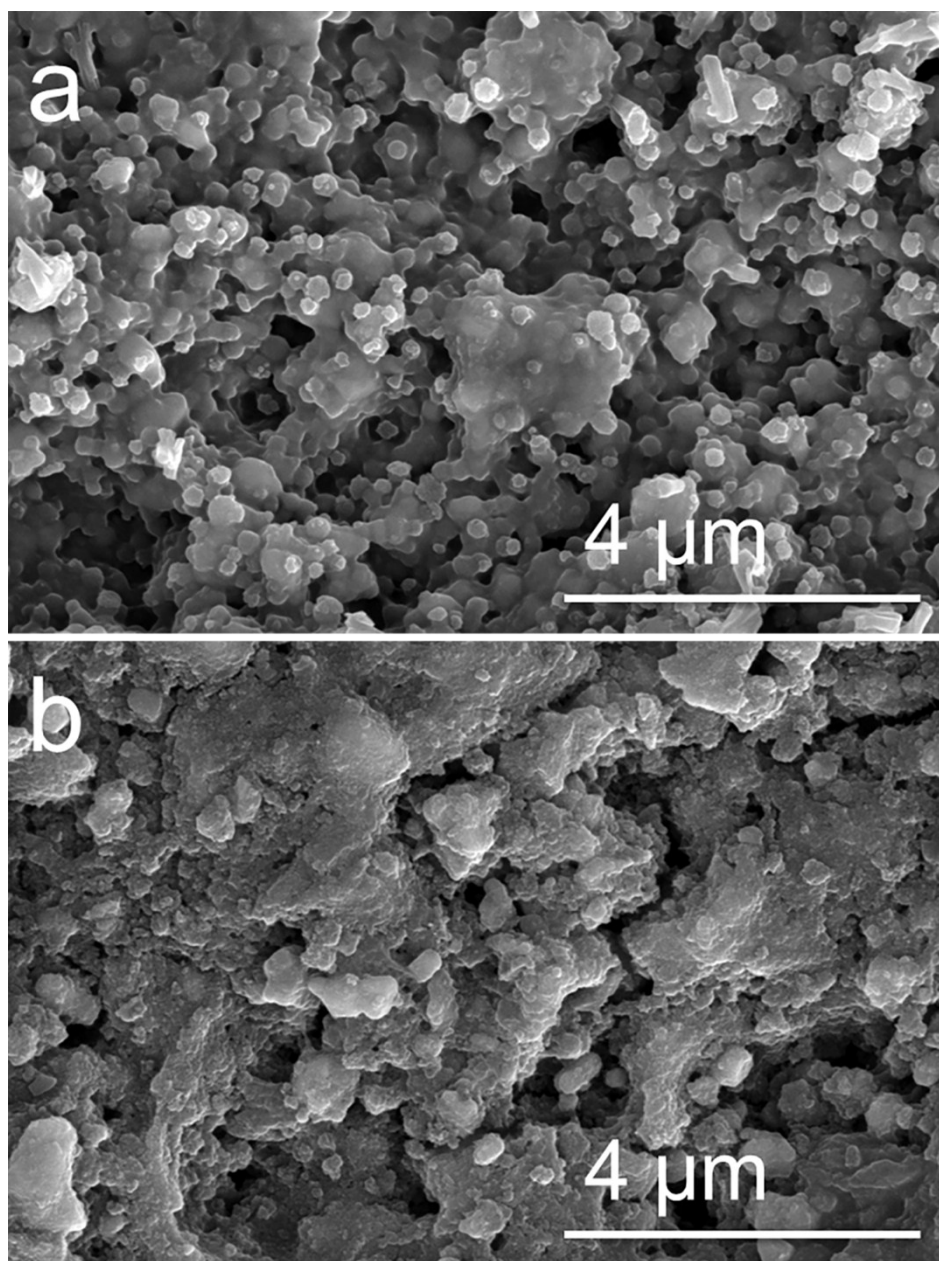

**Fig. S5** the SEM images of the  $\text{Na}_2\text{Li}_2\text{Ti}_6\text{O}_{14}$  nanoparticle electrodes before (a) and after (b) cycling.

**Table S1** The surface area of  $\text{Na}_2\text{Li}_2\text{Ti}_6\text{O}_{14}$  nanofibers and nanoparticles

| sample                                                         | Surface area                            |
|----------------------------------------------------------------|-----------------------------------------|
| $\text{Na}_2\text{Li}_2\text{Ti}_6\text{O}_{14}$ nanofibers    | $5.0084 \pm 0.0840 \text{m}^2/\text{g}$ |
| $\text{Na}_2\text{Li}_2\text{Ti}_6\text{O}_{14}$ nanoparticles | $2.8776 \pm 0.0600 \text{m}^2/\text{g}$ |

**Table S2** Cycling stability comparison of rechargeable  $\text{Na}_2\text{Li}_2\text{Ti}_6\text{O}_{14}$  reported in recent literatures.

| Preparation method                                         | Loading ( $\text{mg}/\text{cm}^2$ ) | Morphology             | Cycle performance                                                                                                                    | Reference |
|------------------------------------------------------------|-------------------------------------|------------------------|--------------------------------------------------------------------------------------------------------------------------------------|-----------|
| Electrospinning                                            | $1.98 \pm 0.2$                      | fibers                 | $100 \text{ mA g}^{-1}$ , 100 cycles, $116.5 \text{ mAh g}^{-1}$<br>$1000 \text{ mA g}^{-1}$ , 800 cycles, $77.8 \text{ mAh g}^{-1}$ | This work |
| Sol-gel                                                    | 5-6                                 |                        | $100 \text{ mA g}^{-1}$ , 60 cycles, $74 \text{ mAh g}^{-1}$                                                                         | 1         |
| Solid-state                                                |                                     | particles              | $50 \text{ mA g}^{-1}$ , 50 cycles, $86.9 \text{ mAh g}^{-1}$                                                                        | 2         |
| Solid-state                                                |                                     | particles              | $100 \text{ mA g}^{-1}$ , 50 cycles, $74 \text{ mAh g}^{-1}$                                                                         | 3         |
| Solid-state and Chemical deposition decomposition          |                                     | particles              | $100 \text{ mA g}^{-1}$ , 50 cycles, $94.2 \text{ mAh g}^{-1}$                                                                       | 4         |
| Solid-state                                                | 2.38                                | particles              | $100 \text{ mA g}^{-1}$ , 50 cycles, $75.2 \text{ mAh g}^{-1}$                                                                       | 5         |
| Molten salt synthesis                                      | 5                                   | whiskers and particles | $100 \text{ mA g}^{-1}$ , 200 cycles, $70 \text{ mAh g}^{-1}$<br>$100 \text{ mA g}^{-1}$ , 500 cycles, $62 \text{ mAh g}^{-1}$       | 6         |
| Sol-gel<br>Solid-state reaction                            |                                     | particles              | $20 \text{ mA g}^{-1}$ , 40 cycles, $114.7 \text{ mAh g}^{-1}$<br>$20 \text{ mA g}^{-1}$ , 40 cycles, $82.3 \text{ mAh g}^{-1}$      | 7         |
| Solid state reaction                                       | 1.25                                | particles              | $100 \text{ mA g}^{-1}$ , 50 cycles, $177.5 \text{ mAh g}^{-1}$                                                                      | 8         |
| Solid-state (dry) and Solution-assisted sonochemical (wet) |                                     | particles              | $0.05 \text{ C}$ , 50 cycles, $> 80 \text{ mAh g}^{-1}$ ,<br>$0.05 \text{ C}$ , 50 cycles, $60 \text{ mAh g}^{-1}$                   | 9         |
| Solvothermal                                               |                                     | particles and spheres  | $50 \text{ mA g}^{-1}$ , 50 cycles, $103.9 \text{ mAh g}^{-1}$                                                                       | 10        |
| Solvent thermal                                            | 0.80                                | Hollow microspheres    | $50 \text{ mA g}^{-1}$ , 50 cycles, $172.3 \text{ mAh g}^{-1}$                                                                       | 11        |
| Sol-gel synthesis                                          |                                     | particles              | $10 \text{ mA g}^{-1}$ , 50 cycles, $95 \text{ mAh g}^{-1}$                                                                          | 12        |
| Solid-state reaction                                       |                                     | particles              | $100 \text{ mA g}^{-1}$ , 50 cycles, $211.8 \text{ mAh g}^{-1}$                                                                      | 13        |
| Solid state                                                | 1.25                                | particles              | $100 \text{ mA g}^{-1}$ , 50 cycles, $75.2 \text{ mAh g}^{-1}$                                                                       | 14        |
| Solid-state                                                | 1.13                                | particles              | $100 \text{ mA g}^{-1}$ , 50 cycles, $189.2 \text{ mAh g}^{-1}$                                                                      | 15        |
| Solid-state                                                | 2.03                                | particles              | $50 \text{ mA g}^{-1}$ , 50 cycles, $206.7 \text{ mAh g}^{-1}$                                                                       | 16        |
| Solid state reaction                                       |                                     | particles              | $50 \text{ mA g}^{-1}$ , 50 cycles, $73.2 \text{ mAh g}^{-1}$                                                                        | 17        |
| Solid-state                                                |                                     | particles              | $500 \text{ mA g}^{-1}$ , 100 cycles, $136.9 \text{ mAh g}^{-1}$                                                                     | 18        |

## References

1. S. Y. Yin, L. Song, X. Y. Wang, Y. H. Huang, K. L. Zhang and Y. X. Zhang, *Electrochem. Commun.*, 2009, **11**, 1251-1254.
2. K. Q. Wu, J. Shu, X. T. Lin, L. Y. Shao, P. Li, M. Shui, M. M. Lao, N. B. Long and D. J. Wang, *J. Power Sources*, 2015, **275**, 419-428.
3. P. Li, K. Q. Wu, P. F. Wang, X. T. Lin, H. X. Yu, M. Shui, X. Zhang, N. B. Long and J. Shu, *Ceram. Int.*, 2015, **41**, 14508-14516.
4. S. S. Qian, H. X. Yu, L. Yan, P. Li, X. T. Lin, Y. Bai, S. J. Wang, N. B. Long, M. Shui and J. Shu, *Ceram. Int.*, 2016, **42**, 6874-6882.
5. J. Shu, K. Q. Wu, P. F. Wang, P. Li, X. T. Lin, L. Y. Shao, M. Shui, N. B. Long and D. J. Wang, *Electrochim. Acta*, 2015, **173**, 595-606.
6. S. Y. Yin, C. Q. Feng, S. J. Wu, H. L. Liu, B. Q. Ke, K. L. Zhang and D. H. Chen, *J. Alloys Compd.*, 2015, **642**, 1-6.
7. K. Q. Wu, D. J. Wang, X. T. Lin, L. Y. Shao, M. Shui, X. X. Jiang, N. B. Long, Y. L. Ren, J. Shu, *J. Electroanal. Chem.*, 2014, **717-718**, 10-16.
8. P. F. Wang, P. Li, T. F. Yi, X. T. Lin, H. X. Yu, Y. R. Zhu, S. S. Qian, M. Shui and J. Shu, *J. Power Sources*, 2015, **297**, 283-294.
9. S. Ghosh, Y. Kee, S. Okada and P. Barpanda, *J. Power Sources*, 2015, **296**, 276-281.
10. S. S. Fan, H. T. Yu, Y. Xie, T. F. Yi and G. H. Tian, *Electrochim. Acta*, 2018, **259**, 855-864.
11. S. S. Fan, H. Zhong, H. T. Yu, M. Lou, Y. Xie and Y. R. Zhu, *Sci. China Mater.*, 2017, **60**, 427-437.
12. D. Dambournet, L. Belharouak and K. Amine, *Inorg. Chem.*, 2010, **49**, 2822-2826.
13. M. M. Lao, X. T. Lin, P. Li, L. Y. Shao, K. Q. Wu, M. Shui, N. B. Long, Y. L. Ren and J. Shu, *Ceram. Int.*, 2015, **41**, 2900-2907.
14. K. Q. Wu, J. Shu, X. T. Lin, L. Y. Shao, M. M. Lao, M. Shui, P. Li, N. B. Long and D. J. Wang, *J. Power Sources*, 2014, **272**, 283-290.
15. P. F. Wang, S. S. Qian, T. F. Yi, H. X. Yu, L. Yan, P. Li, X. T. Lin, M. Shui and J. Shu, *ACS Appl. Mater. Interfaces*, 2016, **8**, 10302-10314.
16. H. Lan, S. S. Qian, Q. Wang, L. Yan, H. X. Yu, P. Li, N. B. Long, M. Shu and J. Shu, *Ceram. Int.*, 2017, **43**, 1552-1557.
17. C. Sun, X. Li, X. Z. Wu, C. C. Zhu, H. X. Yu, Z. Y. Guo and J. Shu, *J. Electroanal. Chem.*, 2017, **802**, 100-108.
18. X. Han, X. Gui, W. Tao, X. F. Li and T. F. Yi, *Ceram. Int.*, 2018, **44**, 12273-12281.
